# Supplementary material for: Highly crystalline strontium ferrites SrFeO3−δ: an easy and effective wet-chemistry synthesis
Source: Royal Society of Chemistry journal article supplement (doi:10.1039/c2dt11916a), 2012-01-01
Supplement: c2dt11916a.pdf [file c2dt11916a.pdf]

### Electronic Supplementary Information

| Sample    | Sr precursor                      | Fe precursor                                         | Stoichiometric ratio (mol/mol) | Solvent                               | Time at 180°C/hours | Calcination temperature/K (where applicable) |
|-----------|-----------------------------------|------------------------------------------------------|--------------------------------|---------------------------------------|---------------------|----------------------------------------------|
| SF-POL-1  | Sr(NO <sub>3</sub> ) <sub>2</sub> | Fe(NO <sub>3</sub> ) <sub>3</sub> ·9H <sub>2</sub> O | 1:2                            | Ethylene glycol (50 ml)               | 2                   | -                                            |
| SF-POL-2  | Sr(NO <sub>3</sub> ) <sub>2</sub> | Fe(NO <sub>3</sub> ) <sub>3</sub> ·9H <sub>2</sub> O | 1:1                            | PEG (50 ml)                           | 2                   | -                                            |
| SF-POL-3  | SrCO <sub>3</sub>                 | FeCl <sub>3</sub> ·6H <sub>2</sub> O                 | 1:1                            | DEG (50 ml)                           | 2                   | 1173                                         |
| SF-POL-4  | SrCO <sub>3</sub>                 | FeCl <sub>3</sub> ·6H <sub>2</sub> O                 | 1:1                            | DEG (50 ml)                           | 5                   | 1173                                         |
| SF-POL-5  | SrCO <sub>3</sub>                 | FeCl <sub>3</sub> ·6H <sub>2</sub> O                 | 1:2                            | DEG (50 ml)                           | 2                   | 1173                                         |
| SF-POL-6  | SrCO <sub>3</sub>                 | FeCl <sub>3</sub> ·6H <sub>2</sub> O                 | 1:2                            | DEG (50 ml)                           | 5                   | 1173                                         |
| SF-POL-7  | SrCO <sub>3</sub>                 | FeCl <sub>3</sub> ·6H <sub>2</sub> O                 | 1:1                            | DEG (40 ml)                           | 2                   | 1173                                         |
| SF-POL-8  | SrCO <sub>3</sub>                 | FeCl <sub>3</sub> ·6H <sub>2</sub> O                 | 1:1                            | DEG (40 ml)                           | 5                   | 1173                                         |
| SF-POL-9  | SrCO <sub>3</sub>                 | FeCl <sub>3</sub> ·6H <sub>2</sub> O                 | 1:2                            | DEG (40 ml) + TENO <sub>2</sub> (2ml) | 2                   | 1173                                         |
| SF-POL-10 | SrCO <sub>3</sub>                 | FeCl <sub>3</sub> ·6H <sub>2</sub> O                 | 1:1                            | DEG (40 ml) + TENO <sub>2</sub> (2ml) | 2                   | 1173                                         |
| SF-POL-11 | SrCO <sub>3</sub>                 | Fe(III)acac                                          | 1:2                            | DEG (40 ml) + TENO <sub>2</sub> (2ml) | 2                   | 1173                                         |
| SF-POL-12 | SrCO <sub>3</sub>                 | Fe(III)acac                                          | 1:1                            | DEG (40 ml) + TENO <sub>2</sub> (2ml) | 2                   | 1173                                         |

Table SM1. Synthesis parameters used for the polyol-assisted syntheses

| Sample   | Temperature/K | <i>a</i> parameter /Å | <i>c</i> parameter/Å |
|----------|---------------|-----------------------|----------------------|
| SF-OX-02 | 1173          | 3.857±0.001           | 3.867±0.001          |
| SF-OX-14 | 1273          | 3.856±0.001           | 3.869±0.001          |
| SF-OX-15 | 1373          | 3.855±0.001           | 3.865±0.001          |
| SF-OX-16 | 1573          | 3.855±0.001           | 3.862±0.001          |

Table SM2. Variation of the crystal cell parameters relative to each sample based upon calcination temperature

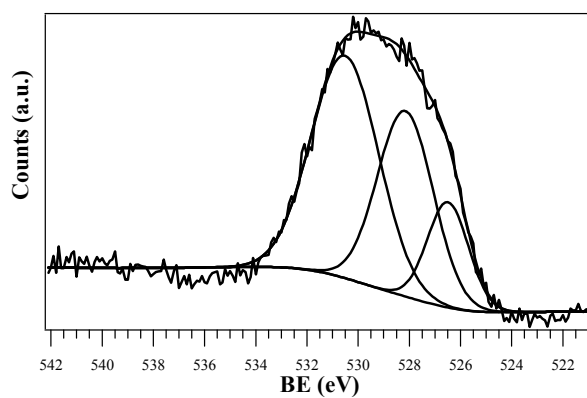

Figure SM3. XPS spectrum of the O1s region of sample SF-OX-2 and relative peak deconvolution

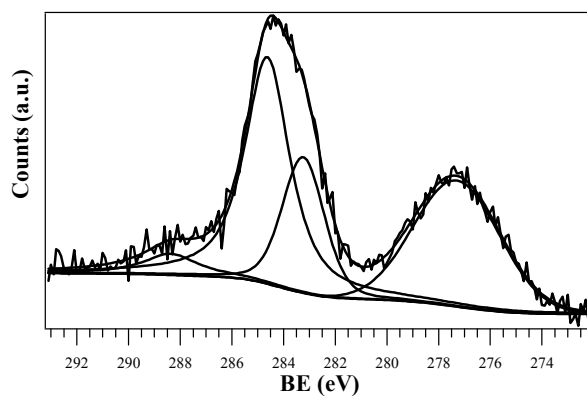

Figure SM4. XPS spectrum of the C1s region of sample SF-OX-2 and relative peak deconvolution
